# Supplementary material
Source: PubMed Central journal article supplement (PMC7217730)
Supplement: NIHMS1569576-supplement-1.pdf [file NIHMS1569576-supplement-1.pdf]

| <b>Online Table EIA: Measurement of alpha-gal specific IgE from alpha-gal allergic patients, before and after overnight incubation with porcine pancreatic enzyme products.</b> |                                                       |                                                                     |                                                                      |                                                                       |
|---------------------------------------------------------------------------------------------------------------------------------------------------------------------------------|-------------------------------------------------------|---------------------------------------------------------------------|----------------------------------------------------------------------|-----------------------------------------------------------------------|
|                                                                                                                                                                                 | <b>Pre-incubation alpha-gal sIgE baseline in kU/L</b> | <b>Alpha-gal sIgE post-incubation with Creon in kU/L (% change)</b> | <b>Alpha-gal sIgE post-incubation with Zenpep in kU/L (% change)</b> | <b>Alpha-gal sIgE post incubation with Viokase in kU/L (% change)</b> |
| Alpha-Gal positive Case #1 from this report                                                                                                                                     | 1.33                                                  | 1.08 (19% decrease)                                                 | 0.97 (27% decrease)                                                  | 1.04 (22% decrease)                                                   |
| Alpha-gal positive control: UNC 178                                                                                                                                             | 25.6                                                  | 23.2 (9% decrease)                                                  | 22.8 (11% decrease)                                                  | 22.5 (12% decrease)                                                   |
| Alpha-gal positive control: UNC 218                                                                                                                                             | 11.7                                                  | 11.3 (3% decrease)                                                  | 9.91 (15% decrease)                                                  | 9.74 (17% decrease)                                                   |
| <b>Online Table EIB: Measurement of total IgE from alpha-gal negative control sera before and after overnight incubation with porcine pancreatic enzyme products.</b>           |                                                       |                                                                     |                                                                      |                                                                       |
|                                                                                                                                                                                 | <b>Pre-incubation total IgE baseline (kU/L)</b>       | <b>Total IgE post-incubation with Creon (kU/L)</b>                  | <b>Total IgE post-incubation with Zenpep (kU/L)</b>                  | <b>Total IgE post incubation with Viokase (kU/L)</b>                  |
| Alpha-Gal Negative Control                                                                                                                                                      | 238                                                   | 248 (4% increase)                                                   | 236 (1% decrease)                                                    | 251 (5% increase)                                                     |
